# Supplementary material for: Absence of Effects of L-Arginine and L-Citrulline on Inflammatory Biomarkers and Oxidative Stress in Response to Physical Exercise: A Systematic Review with Meta-Analysis
Source: MDPI journal article supplement (doi:10.3390/nu15081995), 2023-04-21
Supplement: s1 [file s1]

## SENSITIVITY ANALYSIS

### 1. Meta-analyzes performed without the cited study in outcome “Inflammatory”

| <i>Authors</i>                | <b>Total CI</b>       | <b>Total Heterogeneity</b> |
|-------------------------------|-----------------------|----------------------------|
| <i>Nascimento et al. 2017</i> | 21.54 [-14.51, 57.59] | 95%                        |
| <i>Alves et al. 2014</i>      | 19.54 [-20.52, 59.61] | 96%                        |
| <i>Alves et al. 2014</i>      | 1.58 [-2.36, 5.52]    | 81%                        |

### 2. Meta-analyzes performed without the cited study in outcome “Anti-inflammatory”

| <i>Authors</i>                | <b>Total CI</b>      | <b>Total Heterogeneity</b> |
|-------------------------------|----------------------|----------------------------|
| <i>Puga et al. 2016</i>       | 0.06 [-1.63, 1.75]   | 47%                        |
| <i>Nascimento et al. 2017</i> | 0.05 [-2.52, 2.62]   | 56%                        |
| <i>Alves et al. 2014</i>      | -0.48 [-0.95, -0.00] | 0%                         |
